# Supplementary material for: Development of F1 hybrid population and the high-density linkage map for European aspen (Populus tremula L.) using RADseq technology
Source: PubMed Central journal article supplement (PMC5688504; doi:10.1186/s12870-017-1127-y), 2017-11-14
Supplement: 12870_2017_1127_MOESM2_ESM.pdf [file 12870_2017_1127_MOESM2_ESM.pdf]

ID of parents and F1 progeny of *P.tremula* hybrid population

| P.t. ♂    | P.t. ♂  | P.t. ♂  | P.t. ♂  | P.t. ♂  | P.t. ♂  | P.t. ♂  | P.t. ♂   | P.t. ♂  | P.t. ♀  | P.t. ♀  | P.t. ♀  | P.t. ♀ |
|-----------|---------|---------|---------|---------|---------|---------|----------|---------|---------|---------|---------|--------|
| P.t. ♀    | P.t. ♀  | P.t. ♀  | P.t. ♀  | II-3-8  | II-3-9  | II-3-10 | II-3-10a | II-3-11 | II-3-14 | II-3-15 | II-3-18 |        |
| II-3-19   | II-3-20 | II-3-23 | II-3-24 | II-3-25 | II-3-26 | II-3-27 | II-3-28  | II-3-29 | II-3-31 | II-3-39 | II-3-40 |        |
| II-3-43   | II-3-44 | II-3-59 | II-3-61 | II-3-63 | II-3-64 | II-3-65 | II-3-66  | II-3-68 | II-3-72 | II-3-73 | II-3-74 |        |
| II-3-75   | II-3-76 | II-3-77 | II-3-78 | II-3-79 | II-5-2  | II-5-3  | II-5-4   | II-5-8  | II-5-11 | II-5-12 | II-5-13 |        |
| II-5-14   | II-5-15 | II-5-17 | II-5-20 | II-5-21 | II-5-22 | II-5-23 | II-5-25  | II-5-27 | II-5-30 | II-5-31 | II-5-32 |        |
| II-5-33   | II-5-34 | II-5-36 | II-5-40 | II-5-42 | II-5-43 | II-5-45 | II-5-48  | II-5-51 | II-5-52 | II-5-54 | II-5-59 |        |
| II-5-61   | II-5-62 | II-5-72 | II-5-78 | II-5-80 | II-1-37 | II-1-66 | II-1-78  | II-1-81 | I-3-3   | I-3-6   | I-3-9   |        |
| I-3-12    | I-3-15  | I-3-27  | I-3-31  | I-3-32  | I-3-34  | I-3-38  | I-3-42   | I-3-45  | I-3-50  | I-3-53  | I-3-55  |        |
| I-3-56    | I-3-58  | I-3-59  | I-3-60  | I-3-66  | I-3-67  | I-3-70  | I-3-71   | I-3-72  | I-3-75  | I-3-77  | I-3-78  |        |
| I 4 02 48 | I-4-12  | I-4-15  | I-4-19  | I-4-21  | I-4-26  | I-4-28  | I-4-35   | I-4-39  | I-4-48  | I-4-51  | I-4-65  |        |
| I-4-73    | I-4-76  | I-4-78  | I-4-79  | I-4-81  | II-81   |         |          |         |         |         |         |        |

Number of reads per plant

|         |         |         |         |         |         |         |         |         |         |         |         |  |
|---------|---------|---------|---------|---------|---------|---------|---------|---------|---------|---------|---------|--|
| 409819  | 580746  | 2495935 | 2339984 | 2095526 | 2652722 | 1142205 | 1362847 | 1309498 | 1125397 | 4951747 | 2781051 |  |
| 3158641 | 2063907 | 1563679 | 3214875 | 162419  | 1667320 | 1223804 | 3624830 | 2141321 | 1559517 | 849363  | 2461566 |  |
| 2233784 | 2436085 | 2244530 | 3091497 | 1855034 | 2959190 | 1886385 | 1851545 | 2904143 | 2205750 | 1663915 | 2443913 |  |
| 2573774 | 1291049 | 1591703 | 1156330 | 1530481 | 1234046 | 1398216 | 2134153 | 1573845 | 1481356 | 2158497 | 2015753 |  |
| 2007059 | 1213641 | 1730450 | 2034705 | 2002824 | 1414022 | 725625  | 1311266 | 2297534 | 2524685 | 1282857 | 1755467 |  |
| 1308884 | 1072700 | 2350523 | 1092320 | 879171  | 1742244 | 835723  | 788996  | 1333653 | 1483808 | 1653548 | 1098858 |  |
| 1688232 | 1047198 | 1610343 | 1759418 | 906301  | 1039065 | 837175  | 1700042 | 2178005 | 1926551 | 1950924 | 1656864 |  |
| 1359471 | 1349508 | 909113  | 1289593 | 329229  | 85971   | 237725  | 688097  | 1737748 | 507996  | 4540424 | 2497657 |  |
| 892246  | 1469773 | 722709  | 2291345 | 1285816 | 2969175 | 950355  | 1991108 | 1632568 | 1657975 | 1849268 | 3876104 |  |
| 2061771 | 1086891 | 3060675 | 2456125 | 2876104 | 501126  | 1738079 | 1812403 | 233175  | 2319115 | 3317792 | 1440650 |  |
| 796350  | 1765722 | 2136084 | 2125130 | 108172  | 2507219 | 617068  | 1728878 | 1040484 | 1411759 | 1243230 | 1477233 |  |
| 2555343 | 761703  | 2847479 | 925021  | 2419653 | 1770924 |         |         |         |         |         |         |  |

Percentage of reads mapped to the *P.trichocarpa* reference genome

|         |        |        |        |        |        |        |        |        |        |        |        |  |
|---------|--------|--------|--------|--------|--------|--------|--------|--------|--------|--------|--------|--|
| 0.7745  | 0.7811 | 0.8338 | 0.8512 | 0.8256 | 0.8333 | 0.8263 | 0.8254 | 0.7769 | 0.789  | 0.8349 | 0.8243 |  |
| 0.8373  | 0.8549 | 0.8577 | 0.8352 | 0.8071 | 0.813  | 0.8077 | 0.7566 | 0.8205 | 0.7814 | 0.7383 | 0.8083 |  |
| 0.816   | 0.7931 | 0.8202 | 0.8144 | 0.7519 | 0.8053 | 0.8101 | 0.8259 | 0.776  | 0.7862 | 0.8199 | 0.8229 |  |
| 0.7577  | 0.7919 | 0.8047 | 0.7813 | 0.7998 | 0.772  | 0.7994 | 0.8291 | 0.7786 | 0.791  | 0.819  | 0.7856 |  |
| 0.8274  | 0.7732 | 0.8069 | 0.8163 | 0.7856 | 0.7648 | 0.8038 | 0.8332 | 0.8318 | 0.7882 | 0.7823 | 0.8055 |  |
| 0.804   | 0.8021 | 0.8239 | 0.7804 | 0.816  | 0.7359 | 0.7863 | 0.8053 | 0.8015 | 0.8116 | 0.8141 | 0.8351 |  |
| 0.812   | 0.7681 | 0.8191 | 0.8232 | 0.7977 | 0.8085 | 0.7525 | 0.7533 | 0.8304 | 0.7866 | 0.788  | 0.8145 |  |
| 0.814   | 0.7795 | 0.8279 | 0.7963 | 0.8133 | 0.8963 | 0.1442 | 0.7248 | 0.7814 | 0.7496 | 0.7532 | 0.7498 |  |
| 0.7274  | 0.7306 | 0.6921 | 0.7555 | 0.785  | 0.7698 | 0.7789 | 0.7559 | 0.7266 | 0.7391 | 0.78   | 0.7688 |  |
| 0.78    | 0.7342 | 0.7113 | 0.7599 | 0.7444 | 0.7629 | 0.5554 | 0.7801 | 0.7695 | 0.7669 | 0.7586 | 0.7696 |  |
| 0.74675 | 0.7342 | 0.7785 | 0.7492 | 0.7851 | 0.7496 | 0.5584 | 0.755  | 0.7578 | 0.7566 | 0.7652 | 0.743  |  |
| 0.7258  | 0.7661 | 0.7889 | 0.7268 | 0.8362 | 0.8362 |        |        |        |        |        |        |  |
